# Supplementary material for: Centre-specific bacterial pathogen typing affects infection-control decision making
Source: PubMed Central journal article supplement — Microb Genom. 2021 Aug 6;7(8):000612. doi: 10.1099/mgen.0.000612 (PMC8549354; doi:10.1099/mgen.0.000612), 2021-08-06
Supplement: mgen-7-0612-s001.pdf [file mgen-7-0612-s001.pdf]

Supplementary Table S4

| centre   | 1                                       | 2                                                                      | 5                                       | 6                                       | 7                                      | 8                                       | 9                                                                      | 10                                      | 11                                      | 12                                      | 13                                      |
|----------|-----------------------------------------|------------------------------------------------------------------------|-----------------------------------------|-----------------------------------------|----------------------------------------|-----------------------------------------|------------------------------------------------------------------------|-----------------------------------------|-----------------------------------------|-----------------------------------------|-----------------------------------------|
| tool     | PathogenWatch                           | Resfinder (3.2)                                                        | BioNumerics                             | Resfinder (3.2)                         | abricate                               | ResFinder (2.0)                         | ResFinder                                                              |                                         | ResFinder                               | GoSeqIt                                 | Abricate                                |
| database |                                         | ResFinder                                                              | Resfinder                               | ResFinder                               | NCBI                                   | ResFinder                               | ResFinder                                                              |                                         | ResFinder                               | ResFinder                               | ResFinder                               |
| KP01     | <i>CTX-M-15, SHV-172, TEM-30</i>        | <i>CTX-M-15, SHV-172, TEM-1B</i>                                       | <i>CTX-M-15, SHV-172, TEM-1B</i>        | <i>CTX-M-15, SHV-172, TEM-1B</i>        | <i>CTX-M-15, SHV-172, TEM-1</i>        | <i>CTX-M-15, SHV-11, TEM-1B</i>         | <i>CTX-M-15, SHV-172, TEM-1B</i>                                       | <i>CTX-M-15, SHV-172, TEM-1B</i>        | <i>CTX-M-15, SHV-11, TEM-1B</i>         | <i>CTX-M-15, SHV-172, TEM-1B</i>        | <i>CTX-M-15, SHV-172, TEM-1B</i>        |
| KP02     | <i>CTX-M-9, SHV-187</i>                 | <i>CTX-M-9, SHV-33</i>                                                 | <i>CTX-M-9, SHV-33</i>                  | <i>CTX-M-9, SHV-33</i>                  | <i>CTX-M-9, SHV-187</i>                | <i>CTX-M-9, SHV-1</i>                   | <i>CTX-M-9, SHV-33</i>                                                 | <i>CTX-M-9, SHV-187</i>                 | <i>CTX-M-9, SHV-1</i>                   | <i>CTX-M-9, SHV-33</i>                  | <i>CTX-M-9, SHV-187</i>                 |
| KP03     | <i>CTX-M-15, SHV-27, TEM-30</i>         | <i>CTX-M-15, SHV-110, SHV-191, SHV-27, TEM-1B</i>                      | <i>CTX-M-15, SHV-191, TEM-1B</i>        | <i>CTX-M-15, SHV-27, TEM-1B</i>         | <i>CTX-M-15, SHV-110, TEM-1</i>        | <i>CTX-M-15, SHV-27, TEM-1B</i>         | <i>CTX-M-15, SHV-110, SHV-191, SHV-27, TEM-1B</i>                      | <i>CTX-M-15, SHV-110, TEM-1B</i>        | <i>CTX-M-15, SHV-27, TEM-1B</i>         | <i>CTX-M-15, SHV-27, TEM-1B</i>         | <i>CTX-M-15, SHV-110, TEM-1B</i>        |
| KP04     | <i>CTX-M-15, OXA-1, SHV-187, TEM-30</i> | <i>CTX-M-15, OXA-1, SHV-40, SHV-56, SHV-79, SHV-85, SHV-89, TEM-1B</i> | <i>CTX-M-15, OXA-1, SHV-79, TEM-1B</i>  | <i>CTX-M-15, OXA-1, SHV-40, TEM-1B</i>  | <i>CTX-M-15, OXA-1, SHV-187, TEM-1</i> | <i>CTX-M-15, OXA-1, SHV-11, TEM-1B</i>  | <i>CTX-M-15, OXA-1, SHV-40, SHV-56, SHV-79, SHV-85, SHV-89, TEM-1B</i> | <i>CTX-M-15, OXA-1, SHV-187, TEM-1B</i> | <i>CTX-M-15, OXA-1, SHV-11, TEM-1B</i>  | <i>CTX-M-15, OXA-1, SHV-40, TEM-1B</i>  | <i>CTX-M-15, OXA-1, SHV-187, TEM-1B</i> |
| KP05     | <i>CTX-M-15, SHV-187</i>                | <i>CTX-M-15, SHV-40, SHV-56, SHV-79, SHV-85, SHV-89</i>                | <i>CTX-M-15, SHV-79</i>                 | <i>CTX-M-15, SHV-40</i>                 | <i>CTX-M-15, SHV-187</i>               | <i>CTX-M-15, SHV-11</i>                 | <i>CTX-M-15, SHV-40, SHV-56, SHV-79, SHV-85, SHV-89</i>                | <i>CTX-M-15, SHV-187</i>                | <i>CTX-M-15, SHV-11</i>                 | <i>CTX-M-15, SHV-40</i>                 | <i>CTX-M-15, SHV-187</i>                |
| KP06     | <i>CTX-M-15, OXA-48, SHV-67, TEM-30</i> | <i>CTX-M-15, OXA-48, SHV-11, SHV-67, TEM-1B</i>                        | <i>CTX-M-15, OXA-48, SHV-11, TEM-1B</i> | <i>CTX-M-15, OXA-48, SHV-67, TEM-1B</i> | <i>CTX-M-15, OXA-48, SHV-11, TEM-1</i> | <i>CTX-M-15, OXA-48, SHV-11, TEM-1B</i> | <i>CTX-M-15, OXA-48, SHV-11, SHV-67, TEM-1B</i>                        | <i>CTX-M-15, OXA-48, SHV-11, TEM-1B</i> | <i>CTX-M-15, OXA-48, SHV-11, TEM-1B</i> | <i>CTX-M-15, OXA-48, SHV-67, TEM-1B</i> | <i>CTX-M-15, OXA-48, SHV-11, TEM-1B</i> |
| KP07     | <i>CTX-M-14, OXA-1, SHV-77</i>          | <i>CTX-M-14, OXA-1, SHV-110, SHV-81</i>                                | <i>CTX-M-14, OXA-1, SHV-81</i>          | <i>CTX-M-14, OXA-1, SHV-81</i>          | <i>CTX-M-14, OXA-1, SHV-110</i>        | <i>CTX-M-14, OXA-1, SHV-11</i>          | <i>OXA-1, SHV-110, SHV-81</i>                                          | <i>CTX-M-14, OXA-1, SHV-110</i>         | <i>CTX-M-14, OXA-1, SHV-11</i>          | <i>CTX-M-14, OXA-1, SHV-81</i>          | <i>CTX-M-14, OXA-1, SHV-110</i>         |
| KP08     | <i>CTX-M-14, SHV-142, TEM-30</i>        | <i>CTX-M-14, SHV-142, TEM-1B</i>                                       | <i>CTX-M-14, SHV-142, TEM-1B</i>        | <i>CTX-M-14, SHV-142, TEM-1B</i>        | <i>CTX-M-14, SHV-142, TEM-1</i>        | <i>CTX-M-14, SHV-142, TEM-1B</i>        | <i>CTX-M-14, SHV-142, TEM-1B</i>                                       | <i>CTX-M-14, SHV-142, TEM-1B</i>        | <i>CTX-M-14, SHV-142, TEM-1B</i>        | <i>CTX-M-14, SHV-142, TEM-1B</i>        | <i>CTX-M-14, SHV-142, TEM-1B</i>        |
| KP09     | <i>CTX-M-15, OXA-1, SHV-1</i>           | <i>CTX-M-15, OXA-1, SHV-1</i>                                          | <i>CTX-M-15, OXA-1, SHV-1</i>           | <i>CTX-M-15, OXA-1, SHV-1</i>           | <i>CTX-M-15, OXA-1, SHV-1</i>          | <i>CTX-M-15, OXA-1, SHV-1</i>           |                                                                        | <i>CTX-M-15, OXA-1, SHV-1, TEM-105</i>  | <i>CTX-M-15, OXA-1, SHV-1</i>           | <i>CTX-M-15, OXA-1, SHV-1</i>           | <i>CTX-M-15, OXA-1, SHV-1</i>           |

| centre | 1                                | 2                                                | 5                                | 6                                | 7                               | 8                               | 9                                                | 10                               | 11                                    | 12                               | 13                               |
|--------|----------------------------------|--------------------------------------------------|----------------------------------|----------------------------------|---------------------------------|---------------------------------|--------------------------------------------------|----------------------------------|---------------------------------------|----------------------------------|----------------------------------|
| KP10   | CTX-M-14, SHV-187, TEM-30        | CTX-M-14, SHV-187, TEM-1B                        | CTX-M-14, SHV-1b, TEM-1B         | CTX-M-14, SHV-187, TEM-1B        | CTX-M-14, SHV-187, TEM-1        | CTX-M-14, SHV-83, TEM-1B        | CTX-M-14, SHV-187, TEM-1B                        | CTX-M-14, SHV-187, TEM-1B        | CTX-M-14, SHV-83, TEM-1B              | CTX-M-14, SHV-187, TEM-1B        | CTX-M-14, SHV-187, TEM-1B        |
| KP11   | CTX-M-15, OXA-1, SHV-11, TEM-30  | CTX-M-15, OXA-1, SHV-182, TEM-1B                 | CTX-M-15, OXA-1, SHV-159, TEM-1B | CTX-M-15, OXA-1, SHV-182, TEM-1B | CTX-M-15, OXA-1, SHV-158, TEM-1 | CTX-M-15, OXA-1, SHV-11, TEM-1B | CTX-M-15, OXA-1, SHV-182, TEM-1B                 | CTX-M-15, OXA-1, SHV-182, TEM-1B | CTX-M-15, OXA-1, SHV-11, TEM-1B       | CTX-M-15, OXA-1, SHV-182, TEM-1B | CTX-M-15, OXA-1, SHV-182, TEM-1B |
| KP12   | CTX-M-15, OXA-1, SHV-187, TEM-30 | CTX-M-15, OXA-1, SHV-187, TEM-1B                 | CTX-M-15, OXA-1, SHV-38, TEM-1B  | CTX-M-15, OXA-1, SHV-187, TEM-1B | CTX-M-15, OXA-1, SHV-187, TEM-1 | CTX-M-15, OXA-1, SHV-1, TEM-1B  | CTX-M-15, OXA-1, SHV-187, TEM-1B                 | CTX-M-15, OXA-1, SHV-187, TEM-1B | CTX-M-15, OXA-1, SHV-1, SHV-1, TEM-1B | CTX-M-15, OXA-1, SHV-187, TEM-1B | CTX-M-15, OXA-1, SHV-187, TEM-1B |
| KP13   | CTX-M-3, SHV-27                  | CTX-M-3, SHV-110, SHV-191, SHV-27                | CTX-M-3, SHV-110                 | CTX-M-3, SHV-27                  | CTX-M-3, SHV-110                | CTX-M-3, SHV-27                 | CTX-M-3, SHV-110, SHV-191, SHV-27                | CTX-M-3, SHV-110                 | CTX-M-3, SHV-27                       | CTX-M-3, SHV-27                  | CTX-M-3, SHV-110                 |
| KP14   | CTX-M-15, OXA-1, SHV-11, TEM-30  | CTX-M-15, OXA-1, SHV-182, TEM-1B                 | CTX-M-15, OXA-1, SHV-159, TEM-1B | CTX-M-15, OXA-1, SHV-182, TEM-1B | CTX-M-15, OXA-1, SHV-158, TEM-1 | CTX-M-15, OXA-1, SHV-11, TEM-1B | CTX-M-15, OXA-1, SHV-182, TEM-1B                 | CTX-M-15, OXA-1, SHV-182, TEM-1B | CTX-M-15, OXA-1, SHV-11, TEM-1B       | CTX-M-15, OXA-1, SHV-182, TEM-1B | CTX-M-15, OXA-1, SHV-182, TEM-1B |
| KP15   | CTX-M-15, OXA-1, SHV-28, TEM-30  | CTX-M-15, OXA-1, SHV-106, SHV-28, TEM-1B         | CTX-M-15, OXA-1, SHV-106, TEM-1B | CTX-M-15, OXA-1, SHV-28, TEM-1B  | CTX-M-15, OXA-1, SHV-106, TEM-1 | CTX-M-15, OXA-1, SHV-28, TEM-1B | CTX-M-15, OXA-1, SHV-106, SHV-28, TEM-1B         | CTX-M-15, OXA-1, SHV-106, TEM-1B | CTX-M-15, OXA-1, SHV-28, TEM-1B       | CTX-M-15, OXA-1, SHV-28, TEM-1B  | CTX-M-15, OXA-1, SHV-106, TEM-1B |
| KP16   | CTX-M-15, SHV-187                | CTX-M-15, SHV-40, SHV-56, SHV-79, SHV-85, SHV-89 | CTX-M-15, SHV-79                 | CTX-M-15, SHV-40                 | CTX-M-15, SHV-187               | CTX-M-15, SHV-11                | CTX-M-15, SHV-40, SHV-56, SHV-79, SHV-85, SHV-89 | CTX-M-15, SHV-187                | CTX-M-15, SHV-11                      | CTX-M-15, SHV-40                 | CTX-M-15, SHV-187                |
| KP17   | CTX-M-15, SHV-187, TEM-30        | CTX-M-15, SHV-172, TEM-1B                        | CTX-M-15, SHV-172, TEM-1B        | CTX-M-15, SHV-172, TEM-1B        | CTX-M-15, SHV-215, TEM-1        | CTX-M-15, SHV-11, TEM-1B        | CTX-M-15, SHV-172, TEM-1B                        | CTX-M-15, SHV-187, TEM-1B        | CTX-M-15, SHV-11, TEM-1B              | CTX-M-15, SHV-172, TEM-1B        | CTX-M-15, SHV-187, TEM-1B        |
| KP18   | SHV-12                           | SHV-12, SHV-160                                  | SHV-148                          |                                  | SHV-65                          | SHV-2                           | SHV-12, SHV-160, SHV-66                          | SHV-187, SHV-65                  | SHV-65                                |                                  | SHV-12                           |

| centre | 1                                      | 2                                                                                                   | 5                                       | 6                                      | 7                                        | 8                                     | 9                                                         | 10                                                  | 11                            | 12                                     | 13                                      |
|--------|----------------------------------------|-----------------------------------------------------------------------------------------------------|-----------------------------------------|----------------------------------------|------------------------------------------|---------------------------------------|-----------------------------------------------------------|-----------------------------------------------------|-------------------------------|----------------------------------------|-----------------------------------------|
| KP19   | CTX-M-15, OXA-1, OXA-9, SHV-28, TEM-54 | CTX-M-15, OXA-1, OXA-9, SHV-106, SHV-28, TEM-168, TEM-181, TEM-183, TEM-1A, TEM-231, TEM-54, TEM-93 | CTX-M-15, OXA-1, OXA-9, SHV-106, TEM-1B | CTX-M-15, OXA-1, OXA-9, SHV-28, TEM-1A | CTX-M-15, OXA-1, OXA-9, SHV-212          | CTX-M-15, OXA-1, OXA-9, SHV-1, TEM-1A | CTX-M-15, OXA-1, OXA-9, SHV-106, SHV-28                   | CTX-M-15, OXA-1, OXA-9, SHV-106, TEM-1B             | CTX-M-15, OXA-1, OXA-9, SHV-1 | CTX-M-15, OXA-1, OXA-9, SHV-28         | CTX-M-15, OXA-1, OXA-9, SHV-106         |
| KP20   | SHV-2, TEM-54                          | TEM-1A                                                                                              | SHV-2, TEM-1A                           | SHV-2, TEM-1A                          | TEM-150                                  | TEM-1A                                | SHV-2, TEM-1A                                             | SHV-2, TEM-1A                                       | TEM-1A                        | SHV-2, TEM-1A                          | SHV-2, TEM-1A                           |
| KP21   | CTX-M-3, SHV-77                        | CTX-M-3, SHV-110, SHV-81                                                                            | CTX-M-211, SHV-110                      | CTX-M-3, SHV-81                        | CTX-M-3, SHV-110                         | CTX-M-3, SHV-11                       | CTX-M-3, SHV-110, SHV-81                                  | CTX-M-3, SHV-110                                    | CTX-M-3, SHV-11               | CTX-M-3, SHV-81                        | CTX-M-3, SHV-110                        |
| KP22   | CTX-M-15, SHV-187, TEM-135             | CTX-M-15, SHV-40, SHV-56, SHV-79, SHV-85, SHV-89, TEM-1C                                            | CTX-M-15, SHV-79, TEM-1C                | CTX-M-15, SHV-40, TEM-1C               | CTX-M-15, SHV-187, TEM-235               | CTX-M-15, SHV-11, TEM-1C              | CTX-M-15, SHV-40, SHV-56, SHV-79, SHV-85, SHV-89, TEM-1C  | CTX-M-15, SHV-187, TEM-1C                           | CTX-M-15, SHV-11, TEM-1C      | CTX-M-15, SHV-40, TEM-1C               | CTX-M-15, SHV-187, TEM-1C               |
| KP23   | CTX-M-9                                | CTX-M-9                                                                                             | CTX-M-9                                 | CTX-M-9                                | CTX-M-9                                  | CTX-M-9                               | CTX-M-9                                                   | CTX-M-9                                             |                               | CTX-M-9                                | CTX-M-9                                 |
| KP24   | CTX-M-15, SHV-187, TEM-54              | CTX-M-15, SHV-40, SHV-56, SHV-79, SHV-85, SHV-89, TEM-1A                                            | CTX-M-15, SHV-79, TEM-1A                | CTX-M-15, SHV-40, TEM-1A               | CTX-M-15, SHV-187, TEM-150               | CTX-M-15, SHV-11, TEM-1A              | CTX-M-15, SHV-40, SHV-56, SHV-79, SHV-85, SHV-89, TEM-1A  | CTX-M-15, SHV-187, TEM-1A                           | CTX-M-15, SHV-11, TEM-1A      | CTX-M-15, SHV-40, TEM-1A               | CTX-M-15, SHV-187, TEM-1A               |
| KP25   | CTX-M-15, OXA-1, SHV-1                 | CTX-M-15, OXA-1, SHV-1                                                                              | CTX-M-15, OXA-1, SHV-1                  | CTX-M-15, OXA-1, SHV-1                 | CTX-M-15, OXA-1, SHV-1                   | CTX-M-15, OXA-1, SHV-1                | CTX-M-15, OXA-1, SHV-1                                    | CTX-M-15, OXA-1, SHV-1, TEM-105                     | CTX-M-15, OXA-1, SHV-1        | CTX-M-15, OXA-1, SHV-1                 | CTX-M-15, OXA-1, SHV-1                  |
| KP26   | CTX-M-15, OXA-1, SHV-1                 | CTX-M-15, OXA-1, SHV-1                                                                              | CTX-M-15, OXA-1, SHV-1                  | CTX-M-15, OXA-1, SHV-1                 | CTX-M-15, OXA-1, SHV-1                   | CTX-M-15, OXA-1, SHV-1                | CTX-M-15, OXA-1, SHV-1                                    | CTX-M-15, OXA-1, SHV-1, TEM-105                     | CTX-M-15, OXA-1, SHV-1        | CTX-M-15, OXA-1, SHV-1                 | CTX-M-15, OXA-1, SHV-1                  |
| KP27   | OXA-1, OXA-9, SHV-28, TEM-54           | CTX-M-15, OXA-1, OXA-9, SHV-106, SHV-28, TEM-1A                                                     | CTX-M-15, OXA-1, OXA-9, SHV-106, TEM-1A | CTX-M-15, OXA-1, OXA-9, SHV-28, TEM-1A | CTX-M-15, OXA-1, OXA-9, SHV-212, TEM-150 | CTX-M-15, OXA-1, OXA-9, SHV-1, TEM-1A | CTX-M-15, OXA-1, OXA-9, SHV-106, SHV-28, TEM-1A           | CTX-M-103, CTX-M-114, OXA-1, OXA-9, SHV-106, TEM-1A | CTX-M-15, OXA-1, OXA-9, SHV-1 | CTX-M-15, OXA-1, OXA-9, SHV-28, TEM-1A | CTX-M-15, OXA-1, OXA-9, SHV-106, TEM-1A |
| KP28   | CTX-M-15, SHV-28, TEM-30               | CTX-M-15, SHV-106, SHV-28, TEM-1B                                                                   | CTX-M-15, SHV-106, TEM-209              | CTX-M-15, SHV-28, TEM-1B               | CTX-M-15, SHV-106, TEM-1                 | CTX-M-15, SHV-28, TEM-1B              | CTX-M-15, SHV-106, SHV-28, TEM-1B                         | CTX-M-15, SHV-106, TEM-1B, TEM-1B                   | CTX-M-15, SHV-28, TEM-1B      | CTX-M-15, SHV-28, TEM-1B               | CTX-M-15, SHV-106, TEM-1B               |
| KP29   | SHV-12, TEM-30                         | SHV-12, TEM-1B                                                                                      | SHV-12, TEM-1B                          | TEM-1B                                 | SHV-12, TEM-1                            | TEM-1B                                | SHV-12, SHV-129, SHV-13, SHV-155, SHV-172, SHV-31, TEM-1B | SHV-12, SHV-187, SHV-187, TEM-1B                    | TEM-1B                        | TEM-1B                                 | SHV-12, TEM-1B                          |

| centre | 1                               | 2                                           | 5                                | 6                                | 7                               | 8                               | 9                                           | 10                                                  | 11                              | 12                               | 13                               |
|--------|---------------------------------|---------------------------------------------|----------------------------------|----------------------------------|---------------------------------|---------------------------------|---------------------------------------------|-----------------------------------------------------|---------------------------------|----------------------------------|----------------------------------|
| KP30   | CTX-M-15, SHV-187, TEM-30       | CTX-M-15, SHV-187, TEM-1B                   | CTX-M-15, SHV-38, TEM-1B         | CTX-M-15, SHV-187, TEM-1B        | CTX-M-15, SHV-187, TEM-1        | CTX-M-15, SHV-1, TEM-1B         | CTX-M-15, SHV-187, TEM-1B                   | CTX-M-15, SHV-187, TEM-1B                           | CTX-M-15, SHV-1, TEM-1B         | CTX-M-15, SHV-187, TEM-1B        | CTX-M-15, SHV-187, TEM-1B        |
| KP31   | CTX-M-101, SHV-36               | CTX-M-101, SHV-178, SHV-193, SHV-36, SHV-80 | CTX-M-101, SHV-36                | CTX-M-101, SHV-36                | CTX-M-101, SHV-178              | CTX-M-101, SHV-36               | CTX-M-101, SHV-178, SHV-193, SHV-36, SHV-80 | CTX-M-101, SHV-178                                  | CTX-M-101, SHV-36               | CTX-M-101, SHV-36                | CTX-M-101, SHV-178               |
| KP32   | CTX-M-15, OXA-1, SHV-11, TEM-30 | CTX-M-15, OXA-1, SHV-182, TEM-1B            | CTX-M-15, OXA-1, SHV-159, TEM-1B | CTX-M-15, OXA-1, SHV-182, TEM-1B | CTX-M-15, OXA-1, SHV-158, TEM-1 | CTX-M-15, OXA-1, SHV-11, TEM-1B | CTX-M-15, OXA-1, SHV-182, TEM-1B            | CTX-M-15, OXA-1, SHV-182, TEM-1B                    | CTX-M-15, OXA-1, SHV-11, TEM-1B | CTX-M-15, OXA-1, SHV-182, TEM-1B | CTX-M-15, OXA-1, SHV-182, TEM-1B |
| KP33   | CTX-M-55, SHV-108               | CTX-M-55, SHV-108                           | CTX-M-55, SHV-108                | CTX-M-55, SHV-108                | CTX-M-55, SHV-108               | CTX-M-55, SHV-108               | CTX-M-55, SHV-108                           | CTX-M-55, SHV-108                                   | CTX-M-55, SHV-108               | CTX-M-55, SHV-108                | CTX-M-55, SHV-108                |
| KP34   | CTX-M-14, SHV-67                | CTX-M-14, SHV-11, SHV-67                    | CTX-M-14, SHV-11                 | SHV-67                           | CTX-M-14, SHV-11                | CTX-M-14, SHV-11                | SHV-11, SHV-67                              | CTX-M-14, SHV-11                                    | SHV-11                          | SHV-67                           | CTX-M-14, SHV-11                 |
| KP35   | CTX-M-14, SHV-27                | CTX-M-14, SHV-27                            | CTX-M-14, SHV-27                 | CTX-M-14, SHV-27                 | CTX-M-14, SHV-27                | CTX-M-14, SHV-27                | CTX-M-14, SHV-27                            | CTX-M-14, SHV-27                                    | CTX-M-14, SHV-27                | CTX-M-14, SHV-27                 | CTX-M-14, SHV-27                 |
| KP36   | CTX-M-15, SHV-28, TEM-30        | CTX-M-15, SHV-106, SHV-28, TEM-1B           | CTX-M-15, SHV-106, TEM-1B        | CTX-M-33, SHV-28, TEM-1B         | CTX-M-15, SHV-106, TEM-1        | CTX-M-15, SHV-28, TEM-1B        | CTX-M-15, SHV-106, SHV-28, TEM-1B           | CTX-M-15, SHV-106, TEM-102, TEM-102, TEM-1B, TEM-1B | CTX-M-15, SHV-28, TEM-1B        | SHV-28, TEM-1B                   | CTX-M-15, SHV-106, TEM-1B        |
| KP37   | CTX-M-15, OXA-1, SHV-52, TEM-30 | CTX-M-15, OXA-1, SHV-52, TEM-1B             | CTX-M-15, OXA-1, SHV-52, TEM-1B  | CTX-M-15, OXA-1, SHV-52, TEM-1B  | CTX-M-15, OXA-1, SHV-52, TEM-1  | CTX-M-15, OXA-1, SHV-52, TEM-1B | CTX-M-15, OXA-1, SHV-52, TEM-1B             | CTX-M-15, OXA-1, SHV-52, TEM-1B                     | CTX-M-15, OXA-1, SHV-52, TEM-1B | CTX-M-15, OXA-1, SHV-52, TEM-1B  | CTX-M-15, OXA-1, SHV-52, TEM-1B  |
| KP38   | CTX-M-15, OXA-1, SHV-12, TEM-30 | CTX-M-15, OXA-1, SHV-12, TEM-1B             | CTX-M-15, OXA-1, SHV-119, TEM-1B | CTX-M-15, OXA-1, SHV-12, TEM-1B  | CTX-M-15, OXA-1, SHV-142, TEM-1 | CTX-M-15, OXA-1, SHV-2, TEM-1B  | CTX-M-15, OXA-1, SHV-12, TEM-1B             | CTX-M-15, OXA-1, SHV-119, SHV-187, TEM-1B           | CTX-M-15, OXA-1, TEM-1B         | CTX-M-15, OXA-1, SHV-12, TEM-1B  | CTX-M-15, OXA-1, SHV-12, TEM-1B  |

| centre | 1                               | 2                                                 | 5                                | 6                              | 7                               | 8                        | 9                                                                                | 10                                       | 11                       | 12                             | 13                               |
|--------|---------------------------------|---------------------------------------------------|----------------------------------|--------------------------------|---------------------------------|--------------------------|----------------------------------------------------------------------------------|------------------------------------------|--------------------------|--------------------------------|----------------------------------|
| KP39   | CTX-M-15, OXA-1, SHV-12, TEM-30 | CTX-M-15, OXA-1, SHV-148, SHV-185, SHV-98, TEM-1B | CTX-M-15, OXA-1, SHV-119, TEM-1B | CTX-M-15, OXA-1, SHV-2, TEM-1B | CTX-M-15, OXA-1, SHV-142, TEM-1 | CTX-M-15, OXA-1, TEM-1B  | CTX-M-15, OXA-1, SHV-11, SHV-13, SHV-185, SHV-25, SHV-31, SHV-69, SHV-70, TEM-1B | CTX-M-15, OXA-1, SHV-12, SHV-187, TEM-1B | CTX-M-15, OXA-1, TEM-1B  | CTX-M-15, OXA-1, SHV-2, TEM-1B | CTX-M-15, OXA-1, SHV-187, TEM-1B |
| KP40   | CTX-M-15, SHV-172, TEM-30       | CTX-M-15, SHV-172, TEM-1B                         | CTX-M-15, SHV-172, TEM-1B        | CTX-M-15, SHV-172, TEM-1B      | CTX-M-15, SHV-172, TEM-1        | CTX-M-15, SHV-11, TEM-1B | CTX-M-15, SHV-172, TEM-1B                                                        | CTX-M-15, SHV-172, TEM-1B                | CTX-M-15, SHV-11, TEM-1B | CTX-M-15, SHV-172, TEM-1B      | CTX-M-15, SHV-172, TEM-1B        |

Supplementary Table S5

| centre   | 1                                                    | 2               | 5             | 6               | 7                                                       | 8                                                             | 9             | 10            | 11                                                          | 12            | 13            |
|----------|------------------------------------------------------|-----------------|---------------|-----------------|---------------------------------------------------------|---------------------------------------------------------------|---------------|---------------|-------------------------------------------------------------|---------------|---------------|
| tool     | PathogenWatch                                        | Resfinder (3.2) | BioNumerics   | Resfinder (3.2) | abricate                                                | ResFinder (2.0)                                               | ResFinder     |               | ResFinder                                                   | GoSeqIt       | Abricate      |
| database |                                                      | ResFinder       | Resfinder     | ResFinder       | NCBI                                                    | ResFinder                                                     | ResFinder     |               | ResFinder                                                   | ResFinder     | ResFinder     |
| VRE01    | <i>vanA, vanHA, vanRA, vanSA, vanXA, vanYA, vanZ</i> | <i>VanHAX</i>   | <i>VanHAX</i> | <i>VanHAX</i>   | <i>vanA, vanH-A, vanR, vanS, vanX-A, vanY-A, vanZ-A</i> | <i>VanA, VanH-A, VanR-A, VanS-A, VanX-A, VanY-A, VanZ-A</i>   | <i>VanHAX</i> | <i>VanHAX</i> | <i>VanA, VanH-A, VanR-A, VanS-A, VanX-A, VanY-A, VanZ-A</i> | <i>VanHAX</i> | <i>VanHAX</i> |
| VRE02    | <i>vanA, vanHA, vanRA, vanSA, vanXA, vanYA, vanZ</i> | <i>VanHAX</i>   | <i>VanHAX</i> | <i>VanHAX</i>   | <i>vanA, vanH-A, vanR, vanS, vanX-A, vanY-A, vanZ-A</i> | <i>VanA, VanH-A, VanR-A, VanS-A, VanX-A, VanY-A, VanZ-A</i>   | <i>VanHAX</i> | <i>VanHAX</i> | <i>VanA, VanH-A, VanR-A, VanS-A, VanX-A, VanY-A, VanZ-A</i> | <i>VanHAX</i> | <i>VanHAX</i> |
| VRE03    | <i>vanA, vanHA, vanRA, vanSA, vanXA, vanYA, vanZ</i> | <i>VanHAX</i>   | <i>VanHAX</i> | <i>VanHAX</i>   | <i>vanA, vanH-A, vanR, vanS, vanX-A, vanY-A, vanZ-A</i> | <i>VanA, VanH-A, VanR-A, VanS-A, VanX-A, VanY-A, VanZ-A</i>   | <i>VanHAX</i> | <i>VanHAX</i> | <i>VanA, VanH-A, VanR-A, VanS-A, VanX-A, VanY-A, VanZ-A</i> | <i>VanHAX</i> | <i>VanHAX</i> |
| VRE04    | <i>vanA, vanHA, vanRA, vanSA, vanXA, vanYA, vanZ</i> | <i>VanHAX</i>   | <i>VanHAX</i> | <i>VanHAX</i>   | <i>vanA, vanH-A, vanR, vanS, vanX-A, vanY-A, vanZ-A</i> | <i>VanA, VanH-A, VanR-A, VanS-A, VanX-A, VanY-A, VanZ-A</i>   | <i>VanHAX</i> | <i>VanHAX</i> | <i>VanA, VanH-A, VanR-A, VanS-A, VanX-A, VanY-A, VanZ-A</i> | <i>VanHAX</i> | <i>VanHAX</i> |
| VRE05    | <i>vanA, vanHA, vanRA, vanSA, vanXA</i>              | <i>VanHAX</i>   | <i>VanHAX</i> | <i>VanHAX</i>   | <i>vanA, vanH-A, vanR, vanS, vanX-A</i>                 | <i>VanA, VanH-A, VanR-A, VanS-A, VanX-A</i>                   | <i>VanHAX</i> | <i>VanHAX</i> | <i>VanA, VanH-A, VanR-A, VanS-A, VanX-A</i>                 | <i>VanHAX</i> | <i>VanHAX</i> |
| VRE06    | <i>vanB, vanHB, vanRB, vanSB, vanXB</i>              | <i>VanHBX</i>   | <i>VanHBX</i> | <i>VanHBX</i>   | <i>vanB, vanH-B, vanR, vanS, vanW, vanX-B, vanY-B</i>   | <i>VanA-B, VanH-B, VanR-B, VanS-B, VanW-B, VanX-B, VanY-B</i> | <i>VanHBX</i> | <i>VanHBX</i> | <i>VanB, VanH-B, VanR-B, VanS-B, VanW-B, VanX-B, VanY-B</i> | <i>VanHBX</i> | <i>VanHBX</i> |
| VRE07    | <i>vanB, vanHB, vanRB, vanSB, vanXB</i>              | <i>VanHBX</i>   | <i>VanHBX</i> | <i>VanHBX</i>   | <i>vanB, vanH-B, vanR, vanS, vanW, vanX-B, vanY-B</i>   | <i>VanA-B, VanH-B, VanR-B, VanS-B, VanW-B, VanX-B, VanY-B</i> | <i>VanHBX</i> | <i>VanHBX</i> | <i>VanB, VanH-B, VanR-B, VanS-B, VanW-B, VanX-B, VanY-B</i> | <i>VanHBX</i> | <i>VanHBX</i> |

| centre | 1                                                                   | 2             | 5             | 6             | 7                                                             | 8                                                                           | 9             | 10            | 11                                                                          | 12            | 13            |
|--------|---------------------------------------------------------------------|---------------|---------------|---------------|---------------------------------------------------------------|-----------------------------------------------------------------------------|---------------|---------------|-----------------------------------------------------------------------------|---------------|---------------|
| VRE08  | <i>vanB, vanHB, vanRB, vanSB, vanXB</i>                             | <i>VanHBX</i> | <i>VanHBX</i> | <i>VanHBX</i> | <i>vanB, vanH-B, vanR, vanS, vanW, vanX-B, vanY-B</i>         | <i>VanA-B, VanH-B, VanR-B, VanS-B, VanW-B, VanX-B, VanY-B</i>               | <i>VanHBX</i> | <i>VanHBX</i> | <i>VanB, VanH-B, VanR-B, VanS-B, VanW-B, VanX-B, VanY-B</i>                 | <i>VanHBX</i> | <i>VanHBX</i> |
| VRE09  | <i>vanA, vanHA, vanRA, vanRB, vanSA, vanSB, vanXA, vanYA, vanZA</i> | <i>VanHAX</i> | <i>VanHAX</i> | <i>VanHAX</i> | <i>vanA, vanH-A, vanR, vanS, vanS, vanX-A, vanY-A, vanZ-A</i> | <i>VanA, VanH-A, VanR-A, VanR-B, VanS-A, VanS-B, VanX-A, VanY-A, VanZ-A</i> | <i>VanHAX</i> | <i>VanHAX</i> | <i>VanA, VanH-A, VanR-A, VanR-B, VanS-A, VanS-B, VanX-A, VanY-A, VanZ-A</i> | <i>VanHAX</i> | <i>VanHAX</i> |
| VRE10  | <i>vanA, vanHA, vanRA, vanSA, vanXA, vanYA, vanZ</i>                | <i>VanHAX</i> | <i>VanHAX</i> | <i>VanHAX</i> | <i>vanA, vanH-A, vanR, vanS, vanX-A, vanY-A, vanZ-A</i>       | <i>VanA, VanH-A, VanR-A, VanS-A, VanX-A, VanY-A, VanZ-A</i>                 | <i>VanHAX</i> | <i>VanHAX</i> | <i>VanA, VanH-A, VanR-A, VanS-A, VanX-A, VanY-A, VanZ-A</i>                 | <i>VanHAX</i> | <i>VanHAX</i> |
| VRE11  | <i>vanA, vanHA, vanRA, vanSA, vanXA, vanYA, vanZ</i>                | <i>VanHAX</i> | <i>VanHAX</i> | <i>VanHAX</i> | <i>vanA, vanH-A, vanR, vanS, vanX-A, vanY-A, vanZ-A</i>       | <i>VanA, VanH-A, VanR-A, VanS-A, VanX-A, VanY-A, VanZ-A</i>                 | <i>VanHAX</i> | <i>VanHAX</i> | <i>VanA, VanH-A, VanR-A, VanS-A, VanX-A, VanY-A, VanZ-A</i>                 | <i>VanHAX</i> | <i>VanHAX</i> |
| VRE12  | <i>vanA, vanHA, vanRA, vanSA, vanXA, vanYA, vanZ</i>                | <i>VanHAX</i> | <i>VanHAX</i> | <i>VanHAX</i> | <i>vanA, vanH-A, vanR, vanS, vanX-A, vanY-A, vanZ-A</i>       | <i>VanA, VanH-A, VanR-A, VanS-A, VanX-A, VanY-A, VanZ-A</i>                 | <i>VanHAX</i> | <i>VanHAX</i> | <i>VanA, VanH-A, VanR-A, VanS-A, VanX-A, VanY-A, VanZ-A</i>                 | <i>VanHAX</i> | <i>VanHAX</i> |
| VRE13  | <i>vanB, vanHB, vanRB, vanSB, vanXB</i>                             | <i>VanHBX</i> | <i>VanHBX</i> | <i>VanHBX</i> | <i>vanB, vanH-B, vanR, vanS, vanW, vanX-B, vanY-B</i>         | <i>VanA-B, VanH-B, VanR-B, VanS-B, VanW-B, VanX-B, VanY-B</i>               | <i>VanHBX</i> | <i>VanHBX</i> | <i>VanB, VanH-B, VanR-B, VanS-B, VanW-B, VanX-B, VanY-B</i>                 | <i>VanHBX</i> | <i>VanHBX</i> |
| VRE14  | <i>vanB, vanHB, vanRB, vanSB, vanXB</i>                             | <i>VanHBX</i> | <i>VanHBX</i> | <i>VanHBX</i> | <i>vanB, vanH-B, vanR, vanS, vanW, vanX-B, vanY-B</i>         | <i>VanA-B, VanH-B, VanR-B, VanS-B, VanW-B, VanX-B, VanY-B</i>               | <i>VanHBX</i> | <i>VanHBX</i> | <i>VanB, VanH-B, VanR-B, VanS-B, VanW-B, VanX-B, VanY-B</i>                 | <i>VanHBX</i> | <i>VanHBX</i> |

| centre | 1                                                    | 2      | 5      | 6      | 7                                                       | 8                                                              | 9      | 10     | 11                                                   | 12     | 13     |
|--------|------------------------------------------------------|--------|--------|--------|---------------------------------------------------------|----------------------------------------------------------------|--------|--------|------------------------------------------------------|--------|--------|
| VRE15  | <i>vanB, vanHB, vanRB, vanSB, vanXB</i>              | VanHBX | VanHBX | VanHBX | <i>vanB, vanH-B, vanR, vanS, vanW, vanX-B, vanY-B</i>   | VanA-B, VanH-B, VanR-B, VanS-B, VanW-B, VanX-A, VanX-B, VanY-B | VanHBX | VanHBX | VanB, VanH-B, VanR-B, VanS-B, VanW-B, VanX-B, VanY-B | VanHBX | VanHBX |
| VRE16  | <i>vanA, vanHA, vanRA, vanSA, vanXA, vanYA, vanZ</i> | VanHAX | VanHAX | VanHAX | <i>vanA, vanH-A, vanR, vanS, vanX-A, vanY-A, vanZ-A</i> | VanA, VanH-A, VanR-A, VanS-A, VanX-A, VanY-A, VanZ-A           | VanHAX | VanHAX | VanA, VanH-A, VanR-A, VanS-A, VanX-A, VanY-A, VanZ-A | VanHAX | VanHAX |
| VRE17  | <i>vanA, vanHA, vanRA, vanSA, vanXA, vanYA, vanZ</i> | VanHAX | VanHAX | VanHAX | <i>vanA, vanH-A, vanR, vanS, vanX-A, vanY-A, vanZ-A</i> | VanA, VanH-A, VanR-A, VanS-A, VanX-A, VanY-A, VanZ-A           | VanHAX | VanHAX | VanA, VanH-A, VanR-A, VanS-A, VanX-A, VanY-A, VanZ-A | VanHAX | VanHAX |
| VRE18  | <i>vanA, vanHA, vanRA, vanSA, vanXA, vanYA, vanZ</i> | VanHAX | VanHAX | VanHAX | <i>vanA, vanH-A, vanR, vanS, vanX-A, vanY-A, vanZ-A</i> | VanA, VanH-A, VanR-A, VanS-A, VanX-A, VanY-A, VanZ-A           | VanHAX | VanHAX | VanA, VanH-A, VanR-A, VanS-A, VanX-A, VanY-A, VanZ-A | VanHAX | VanHAX |
| VRE19  | <i>vanA, vanHA, vanRA, vanSA, vanXA, vanYA, vanZ</i> | VanHAX | VanHAX | VanHAX | <i>vanA, vanH-A, vanR, vanS, vanX-A, vanY-A, vanZ-A</i> | VanA, VanH-A, VanR-A, VanS-A, VanX-A, VanY-A, VanZ-A           | VanHAX | VanHAX | VanA, VanH-A, VanR-A, VanS-A, VanX-A, VanY-A, VanZ-A | VanHAX | VanHAX |
| VRE20  | <i>vanA, vanHA, vanRA, vanSA, vanXA, vanYA, vanZ</i> | VanHAX | VanHAX | VanHAX | <i>vanA, vanH-A, vanR, vanS, vanX-A, vanY-A, vanZ-A</i> | VanA, VanH-A, VanR-A, VanS-A, VanX-A, VanY-A, VanZ-A           | VanHAX | VanHAX | VanA, VanH-A, VanR-A, VanS-A, VanX-A, VanY-A, VanZ-A | VanHAX | VanHAX |
| VRE21  | <i>vanA, vanHA, vanRA, vanSA, vanXA, vanYA, vanZ</i> | VanHAX | VanHAX | VanHAX | <i>vanA, vanH-A, vanR, vanS, vanX-A, vanY-A, vanZ-A</i> | VanA, VanH-A, VanR-A, VanS-A, VanX-A, VanY-A, VanZ-A           | VanHAX | VanHAX | VanA, VanH-A, VanR-A, VanS-A, VanX-A, VanY-A, VanZ-A | VanHAX | VanHAX |
| VRE22  | <i>vanA, vanHA, vanRA, vanSA, vanXA, vanYA, vanZ</i> | VanHAX | VanHAX | VanHAX | <i>vanA, vanH-A, vanR, vanS, vanX-A, vanY-A, vanZ-A</i> | VanA, VanH-A, VanR-A, VanS-A, VanX-A, VanY-A, VanZ-A           | VanHAX | VanHAX | VanA, VanH-A, VanR-A, VanS-A, VanX-A, VanY-A, VanZ-A | VanHAX | VanHAX |



| centre | 1                                                    | 2      | 5      | 6      | 7                                                       | 8                                                             | 9      | 10     | 11                                                          | 12     | 13     |
|--------|------------------------------------------------------|--------|--------|--------|---------------------------------------------------------|---------------------------------------------------------------|--------|--------|-------------------------------------------------------------|--------|--------|
| VRE23  | <i>vanA, vanHA, vanRA, vanSA, vanXA, vanYA, vanZ</i> | VanHAX | VanHAX | VanHAX | <i>vanA, vanH-A, vanR, vanS, vanX-A, vanY-A, vanZ-A</i> | <i>VanA, VanH-A, VanR-A, VanS-A, VanX-A, VanY-A, VanZ-A</i>   | VanHAX | VanHAX | <i>VanA, VanH-A, VanR-A, VanS-A, VanX-A, VanY-A, VanZ-A</i> | VanHAX | VanHAX |
| VRE24  | <i>vanA, vanHA, vanRA, vanSA, vanXA, vanYA, vanZ</i> | VanHAX | VanHAX | VanHAX | <i>vanA, vanH-A, vanR, vanS, vanX-A, vanY-A, vanZ-A</i> | <i>VanA, VanH-A, VanR-A, VanS-A, VanX-A, VanY-A, VanZ-A</i>   | VanHAX | VanHAX | <i>VanA, VanH-A, VanR-A, VanS-A, VanX-A, VanY-A, VanZ-A</i> | VanHAX | VanHAX |
| VRE25  | <i>vanA, vanHA, vanRA, vanSA, vanXA, vanYA, vanZ</i> | VanHAX | VanHAX | VanHAX | <i>vanA, vanH-A, vanR, vanS, vanX-A, vanY-A, vanZ-A</i> | <i>VanA, VanH-A, VanR-A, VanS-A, VanX-A, VanY-A, VanZ-A</i>   | VanHAX | VanHAX | <i>VanA, VanH-A, VanR-A, VanS-A, VanX-A, VanY-A, VanZ-A</i> | VanHAX | VanHAX |
| VRE26  | <i>vanA, vanHA, vanRA, vanSA, vanXA, vanYA, vanZ</i> | VanHAX | VanHAX | VanHAX | <i>vanA, vanH-A, vanR, vanS, vanX-A, vanY-A, vanZ-A</i> | <i>VanA, VanH-A, VanR-A, VanS-A, VanX-A, VanY-A, VanZ-A</i>   | VanHAX | VanHAX | <i>VanA, VanH-A, VanR-A, VanS-A, VanX-A, VanY-A, VanZ-A</i> | VanHAX | VanHAX |
| VRE27  | <i>vanB, vanHB, vanRB, vanSB, vanXB</i>              | VanHBX | VanHBX | VanHBX | <i>vanB, vanH-B, vanR, vanS, vanW, vanX-B, vanY-B</i>   | <i>VanA-B, VanH-B, VanR-B, VanS-B, VanW-B, VanX-B, VanY-B</i> | VanHBX | VanHBX | <i>VanB, VanH-B, VanR-B, VanS-B, VanW-B, VanX-B, VanY-B</i> | VanHBX | VanHBX |
| VRE28  | <i>vanA, vanHA, vanRA, vanSA, vanXA, vanYA, vanZ</i> | VanHAX | VanHAX | VanHAX | <i>vanA, vanH-A, vanR, vanS, vanX-A, vanY-A, vanZ-A</i> | <i>VanA, VanH-A, VanR-A, VanS-A, VanX-A, VanY-A, VanZ-A</i>   | VanHAX | VanHAX | <i>VanA, VanH-A, VanR-A, VanS-A, VanX-A, VanY-A, VanZ-A</i> | VanHAX | VanHAX |
| VRE29  | <i>vanA, vanHA, vanRA, vanSA, vanXA, vanYA, vanZ</i> | VanHAX | VanHAX | VanHAX | <i>vanA, vanH-A, vanR, vanS, vanX-A, vanY-A, vanZ-A</i> | <i>VanA, VanH-A, VanR-A, VanS-A, VanX-A, VanY-A, VanZ-A</i>   | VanHAX | VanHAX | <i>VanA, VanH-A, VanR-A, VanS-A, VanX-A, VanY-A, VanZ-A</i> | VanHAX | VanHAX |
| VRE30  | <i>vanB, vanHB, vanRB, vanSB, vanXB</i>              | VanHBX | VanHBX | VanHBX | <i>vanB, vanH-B, vanR, vanS, vanW, vanX-B, vanY-B</i>   | <i>VanA-B, VanH-B, VanR-B, VanS-B, VanW-B, VanX-B, VanY-B</i> | VanHBX | VanHBX | <i>VanB, VanH-B, VanR-B, VanS-B, VanW-B, VanX-B, VanY-B</i> | VanHBX | VanHBX |

| centre | 1                                                    | 2             | 5             | 6             | 7                                                       | 8                                                             | 9             | 10            | 11                                                          | 12            | 13            |
|--------|------------------------------------------------------|---------------|---------------|---------------|---------------------------------------------------------|---------------------------------------------------------------|---------------|---------------|-------------------------------------------------------------|---------------|---------------|
| VRE31  | <i>vanA, vanHA, vanRA, vanSA, vanXA, vanYA, vanZ</i> | <i>VanHAX</i> | <i>VanHAX</i> | <i>VanHAX</i> | <i>vanA, vanH-A, vanR, vanS, vanX-A, vanY-A, vanZ-A</i> | <i>VanA, VanH-A, VanR-A, VanS-A, VanX-A, VanY-A, VanZ-A</i>   | <i>VanHAX</i> | <i>VanHAX</i> | <i>VanA, VanH-A, VanR-A, VanS-A, VanX-A, VanY-A, VanZ-A</i> | <i>VanHAX</i> | <i>VanHAX</i> |
| VRE32  | <i>vanA, vanHA, vanRA, vanSA, vanXA, vanYA, vanZ</i> | <i>VanHAX</i> | <i>VanHAX</i> | <i>VanHAX</i> | <i>vanA, vanH-A, vanR, vanS, vanX-A, vanY-A, vanZ-A</i> | <i>VanA, VanH-A, VanR-A, VanS-A, VanX-A, VanY-A, VanZ-A</i>   | <i>VanHAX</i> | <i>VanHAX</i> | <i>VanA, VanH-A, VanR-A, VanS-A, VanX-A, VanY-A, VanZ-A</i> | <i>VanHAX</i> | <i>VanHAX</i> |
| VRE33  | <i>vanB, vanHB, vanRB, vanSB, vanXB</i>              | <i>VanHBX</i> | <i>VanHBX</i> | <i>VanHBX</i> | <i>vanB, vanH-B, vanR, vanS, vanW, vanX-B, vanY-B</i>   | <i>VanA-B, VanH-B, VanR-B, VanS-B, VanW-B, VanX-B, VanY-B</i> | <i>VanHBX</i> | <i>VanHBX</i> | <i>VanB, VanH-B, VanR-B, VanS-B, VanW-B, VanX-B, VanY-B</i> | <i>VanHBX</i> | <i>VanHBX</i> |
| VRE34  | <i>vanB, vanHB, vanRB, vanSB, vanXB</i>              | <i>VanHBX</i> | <i>VanHBX</i> | <i>VanHBX</i> | <i>vanB, vanH-B, vanR, vanS, vanW, vanX-B, vanY-B</i>   | <i>VanA-B, VanH-B, VanR-B, VanS-B, VanW-B, VanX-B, VanY-B</i> | <i>VanHBX</i> | <i>VanHBX</i> | <i>VanB, VanH-B, VanR-B, VanS-B, VanW-B, VanX-B, VanY-B</i> | <i>VanHBX</i> | <i>VanHBX</i> |
| VRE35  | <i>vanB, vanHB, vanRB, vanSB, vanXB</i>              | <i>VanHBX</i> | <i>VanHBX</i> | <i>VanHBX</i> | <i>vanB, vanH-B, vanR, vanS, vanW, vanX-B, vanY-B</i>   | <i>VanA-B, VanH-B, VanR-B, VanS-B, VanW-B, VanX-B, VanY-B</i> | <i>VanHBX</i> | <i>VanHBX</i> | <i>VanB, VanH-B, VanR-B, VanS-B, VanW-B, VanX-B, VanY-B</i> | <i>VanHBX</i> | <i>VanHBX</i> |
| VRE36  | <i>vanA, vanHA, vanRA, vanSA, vanXA, vanYA, vanZ</i> | <i>VanHAX</i> | <i>VanHAX</i> | <i>VanHAX</i> | <i>vanA, vanH-A, vanR, vanS, vanX-A, vanY-A, vanZ-A</i> | <i>VanA, VanH-A, VanR-A, VanS-A, VanX-A, VanY-A, VanZ-A</i>   | <i>VanHAX</i> | <i>VanHAX</i> | <i>VanA, VanH-A, VanR-A, VanS-A, VanX-A, VanY-A, VanZ-A</i> | <i>VanHAX</i> | <i>VanHAX</i> |
| VRE37  | <i>vanA, vanHA, vanRA, vanSA, vanXA, vanYA, vanZ</i> | <i>VanHAX</i> | <i>VanHAX</i> | <i>VanHAX</i> | <i>vanA, vanH-A, vanR, vanS, vanX-A, vanY-A, vanZ-A</i> | <i>VanA, VanH-A, VanR-A, VanS-A, VanX-A, VanY-A, VanZ-A</i>   | <i>VanHAX</i> | <i>VanHAX</i> | <i>VanA, VanH-A, VanR-A, VanS-A, VanX-A, VanY-A, VanZ-A</i> | <i>VanHAX</i> | <i>VanHAX</i> |
| VRE38  | <i>vanA, vanHA, vanRA, vanSA, vanXA, vanYA, vanZ</i> | <i>VanHAX</i> | <i>VanHAX</i> | <i>VanHAX</i> | <i>vanA, vanH-A, vanR, vanS, vanX-A, vanY-A, vanZ-A</i> | <i>VanA, VanH-A, VanR-A, VanS-A, VanX-A, VanY-A, VanZ-A</i>   | <i>VanHAX</i> | <i>VanHAX</i> | <i>VanA, VanH-A, VanR-A, VanS-A, VanX-A, VanY-A, VanZ-A</i> | <i>VanHAX</i> | <i>VanHAX</i> |

| centre | 1                                                    | 2             | 5             | 6             | 7                                                       | 8                                                           | 9             | 10            | 11                                                          | 12            | 13            |
|--------|------------------------------------------------------|---------------|---------------|---------------|---------------------------------------------------------|-------------------------------------------------------------|---------------|---------------|-------------------------------------------------------------|---------------|---------------|
| VRE39  | <i>vanA, vanHA, vanRA, vanSA, vanXA, vanYA, vanZ</i> | <i>VanHAX</i> | <i>VanHAX</i> | <i>VanHAX</i> | <i>vanA, vanH-A, vanR, vanS, vanX-A, vanY-A, vanZ-A</i> | <i>VanA, VanH-A, VanR-A, VanS-A, VanX-A, VanY-A, VanZ-A</i> | <i>VanHAX</i> | <i>VanHAX</i> | <i>VanA, VanH-A, VanR-A, VanS-A, VanX-A, VanY-A, VanZ-A</i> | <i>VanHAX</i> | <i>VanHAX</i> |
| VRE40  | <i>vanA, vanHA, vanRA, vanSA, vanXA, vanYA, vanZ</i> | <i>VanHAX</i> | <i>VanHAX</i> | <i>VanHAX</i> | <i>vanA, vanH-A, vanR, vanS, vanX-A, vanY-A, vanZ-A</i> | <i>VanA, VanH-A, VanR-A, VanS-A, VanX-A, VanY-A, VanZ-A</i> | <i>VanHAX</i> | <i>VanHAX</i> | <i>VanA, VanH-A, VanR-A, VanS-A, VanX-A, VanY-A, VanZ-A</i> | <i>VanHAX</i> | <i>VanHAX</i> |
